# Supplementary material for: Assessment of Multipollutant Exposures During Pregnancy Using Silicone Wristbands
Source: Front Public Health. 2020 Sep 29;8:547239. doi: 10.3389/fpubh.2020.547239 (PMC7550746; doi:10.3389/fpubh.2020.547239)
Supplement: Supplementary file 1 [file Table_1.DOCX]

Supplementary Material:

Assessment of Multipollutant Exposures during Pregnancy using Silicone Wristbands

Brett T Doherty1*, John L Pearce2, Kim A Anderson3, Margaret R Karagas1, Megan E Romano1 on behalf of program collaborators for Environmental Influences on Child Health Outcomes

1Department of Epidemiology, Geisel School of Medicine at Dartmouth, Hanover, New Hampshire, USA

2Department of Public Health Sciences, Medical University of South Carolina, Charleston, South Carolina, USA

3Department of Environmental and Molecular Toxicology, Oregon State University, Corvallis, Oregon, USA

**Contents**

Supplemental Table 1. Descriptive statistics of chemical concentrations (ng/g silicone) measured in silicone wristbands worn at 12 or 24 gestational weeks.........................................................................2

Supplemental Table 2. Summary of chemicals detected in silicone wristbands by MyExposome classification...........................................................................................................................................9

Supplemental Table 3. Multivariable linear regression of specific characteristics in relation to wristband chemical detection or chemical concentrations...................................................................10

Supplemental Table 4. Multivariable linear regression of season in relation to chemical concentrations measured in wristbands worn at 12 gestational weeks.................................................11

Supplemental Table 5. Median concentrations of chemicals measured in wristbands worn at 12 gestational weeks by SOM profile........................................................................................................12

| Supplemental Table 1. Descriptive statistics of chemical concentrations (ng/g silicone) measured in silicone wristbands worn at 12 or 24 gestational weeks. | | | | | | | | | | | | |
| --- | --- | --- | --- | --- | --- | --- | --- | --- | --- | --- | --- | --- |
|  |  | 12 Gestational Weeks  (n = 225) | | 24 Gestational Weeks  (n = 20) | | MyExposome Classification | | | | | | |
| Chemical | CASN | % Detected | Median (IQR) | % Detected | Median (IQR) | Chemicals in Commerce | Personal Care Products | Pesticides | Consumer Products | Flame Retardants | Pharmacologic | PAHs |
| Di-n-butyl phthalate | 84-74-2 | 99 | 4580 (2440, 8490) | 100 | 8790 (5935, 14725) | X | X | X |  |  |  |  |
| Galaxolide | 1222-05-5 | 98 | 6930 (2380, 16000) | 90 | 7470 (3028, 19250) | X | X |  |  |  |  |  |
| Diisobutyl phthalate | 84-69-5 | 97 | 4810 (2445, 8335) | 80 | 6680 (768, 10800) | X |  |  |  |  |  |  |
| Butyl benzyl phthalate | 85-68-7 | 94 | 2650 (1115, 8230) | 80 | 7385 (3038, 13675) | X |  |  |  |  |  |  |
| Lilial | 80-54-6 | 90 | 1150 (332, 2895) | 90 | 1570 (673, 8978) |  | X |  |  |  |  |  |
| Benzyl salicylate | 118-58-1 | 89 | 5050 (1755, 12800) | 95 | 12750 (4382, 17875) |  | X |  |  |  |  |  |
| Tonalide | 1506-02-1 | 83 | 297 (76, 1065) | 80 | 564 (196, 3165) |  | X |  |  |  |  |  |
| N,N-Diethyl-m-toluamide | 134-62-3 | 83 | 715 (196, 1710) | 95 | 2830 (1027, 13925) |  |  | X |  |  |  |  |
| Benzophenone | 119-61-9 | 82 | 220 (104, 422) | 80 | 845 (330, 1138) | X | X |  |  |  |  |  |
| Ethylene brassylate | 105-95-3 | 82 | 4580 (592, 13600) | 90 | 6825 (1595, 14600) |  | X |  |  |  |  |  |
| Benzyl benzoate | 120-51-4 | 82 | 2570 (763, 8840) | 85 | 7860 (3772, 17425) |  |  | X |  |  |  |  |
| Di-n-nonyl phthalate | 84-76-4 | 67 | 662 (0, 2415) | 70 | 6205 (0, 8835) | X |  |  |  |  |  |  |
| Permethrin | 52645-53-1 | 67 | 265 (0, 1285) | 70 | 576 (0, 871) |  |  | X |  |  |  |  |
| Diethyl phthalate | 84-66-2 | 64 | 777 (0, 2520) | 100 | 3075 (2165, 12425) | X |  | X |  |  |  |  |
| Butylated hydroxyanisole | 25013-16-5 | 64 | 72 (0, 174) | 10 | 0 (0, 0) |  | X |  |  |  | X |  |
| 2,4-Di-tert-butylphenol | 96-76-4 | 61 | 203 (0, 972) | 60 | 420 (0, 1075) | X |  |  |  |  |  |  |
| Bis(2-ethylhexyl)phthalate | 117-81-7 | 60 | 1580 (0, 56750) | 55 | 2215 (0, 95575) | X |  | X |  |  |  |  |
| Triphenyl Phosphate | 115-86-6 | 58 | 163 (0, 580) | 75 | 504 (160, 1580) | X |  |  |  | X |  |  |
| Butylated hydroxytoluene | 128-37-0 | 57 | 60 (0, 374) | 55 | 336 (0, 934) | X |  |  | X |  |  |  |
| Amyl cinnamal | 122-40-7 | 55 | 141 (0, 675) | 55 | 658 (0, 2972) |  | X |  |  |  |  |  |
| TCPP | 26248-87-3 | 52 | 63 (0, 582) | 30 | 0 (0, 862) | X |  |  |  | X |  |  |
| B-Ionone | 79-77-6 | 40 | 0 (0, 161) | 40 | 0 (0, 442) |  | X |  |  |  |  |  |
| Permethrin II | 999046-03-6 | 39 | 0 (0, 656) | 30 | 0 (0, 755) |  |  | X |  |  |  |  |
| Benzothiazole | 95-16-9 | 39 | 0 (0, 69) | 15 | 0 (0, 0) | X |  |  |  |  |  |  |
| Caffeine | 58-08-2 | 32 | 0 (0, 339) | 50 | 184 (0, 1592) |  |  |  | X |  | X |  |
| 2,4-Bis(alpha,alpha-dimethylbenzyl)phenol | 2772-45-4 | 29 | 0 (0, 48) | 0 | 0 (0, 0) | X |  |  |  |  |  |  |
| Anthracene | 120-12-7 | 27 | 0 (0, 11) | 10 | 0 (0, 0) |  |  |  |  |  |  | X |
| Coumarin | 91-64-5 | 24 | 0 (0, 0) | 0 | 0 (0, 0) |  | X |  | X |  |  |  |
| B-citronellol | 106-22-9 | 24 | 0 (0, 0) | 5 | 0 (0, 0) |  | X |  | X |  |  |  |
| Ethofenprox | 80844-07-1 | 21 | 0 (0, 0) | 0 | 0 (0, 0) |  |  | X |  |  |  |  |
| Dicyclohexyl phthalate | 84-61-7 | 20 | 0 (0, 0) | 25 | 0 (0, 215) | X |  |  |  |  |  |  |
| Citral A | 5392-40-5 | 20 | 0 (0, 0) | 0 | 0 (0, 0) |  | X |  | X |  |  |  |
| 1-Methylnaphthalene | 90-12-0 | 20 | 0 (0, 0) | 0 | 0 (0, 0) | X |  |  |  |  |  | X |
| Linalool | 78-70-6 | 18 | 0 (0, 0) | 15 | 0 (0, 0) |  | X | X |  |  |  |  |
| Di-n-octyl phthalate | 117-84-0 | 15 | 0 (0, 0) | 10 | 0 (0, 0) | X |  |  |  |  |  |  |
| Naphthalene | 91-20-3 | 15 | 0 (0, 0) | 0 | 0 (0, 0) |  |  |  |  |  |  | X |
| Exaltolide [15-Pentadecanolide] | 106-02-5 | 15 | 0 (0, 0) | 30 | 0 (0, 3540) |  | X |  |  |  |  |  |
| Cinnamal | 104-55-2 | 14 | 0 (0, 0) | 0 | 0 (0, 0) | X | X | X | X |  |  |  |
| A-Ionone | 127-41-3 | 14 | 0 (0, 0) | 15 | 0 (0, 0) |  | X |  |  |  |  |  |
| Tributyl phosphate | 126-73-8 | 13 | 0 (0, 0) | 10 | 0 (0, 0) | X |  |  |  | X |  |  |
| Tris(2-ethylhexyl) phosphate | 78-42-2 | 12 | 0 (0, 0) | 10 | 0 (0, 0) | X |  |  |  | X |  |  |
| Piperonyl butoxide | 51-03-6 | 12 | 0 (0, 0) | 10 | 0 (0, 0) |  |  | X |  |  |  |  |
| 4-Chloro-3,5-dimethylphenol | 88-04-0 | 11 | 0 (0, 0) | 10 | 0 (0, 0) | X |  |  |  |  |  |  |
| Pyrene | 129-00-0 | 11 | 0 (0, 0) | 0 | 0 (0, 0) | X |  |  |  |  |  | X |
| Quinoline | 91-22-5 | 11 | 0 (0, 0) | 0 | 0 (0, 0) | X |  |  |  |  |  |  |
| Di-n-hexyl phthalate | 84-75-3 | 10 | 0 (0, 0) | 15 | 0 (0, 0) | X |  |  |  |  |  |  |
| Dimethyl phthalate | 131-11-3 | 9 | 0 (0, 0) | 5 | 0 (0, 0) | X |  | X |  |  |  |  |
| 4-Tert-butylphenol | 98-54-4 | 9 | 0 (0, 0) | 5 | 0 (0, 0) | X |  |  | X |  |  |  |
| Triclosan | 3380-34-5 | 8 | 0 (0, 0) | 0 | 0 (0, 0) | X | X |  |  |  | X |  |
| Phenanthrene | 85-01-8 | 7 | 0 (0, 0) | 5 | 0 (0, 0) |  |  |  |  |  |  | X |
| Drometrizole | 2440-22-4 | 7 | 0 (0, 0) | 0 | 0 (0, 0) | X |  |  | X |  |  |  |
| Methoprene II | 999045-03-3 | 6 | 0 (0, 0) | 0 | 0 (0, 0) |  |  | X |  |  |  |  |
| Lyral | 31906-04-4 | 6 | 0 (0, 0) | 5 | 0 (0, 0) |  | X |  |  |  |  |  |
| Eugenol | 97-53-0 | 6 | 0 (0, 0) | 10 | 0 (0, 0) | X | X | X | X |  | X |  |
| D-Limonene | 5989-27-5 | 6 | 0 (0, 0) | 0 | 0 (0, 0) |  | X |  | X |  |  |  |
| Benzyl alcohol | 100-51-6 | 6 | 0 (0, 0) | 0 | 0 (0, 0) | X | X |  | X |  | X |  |
| 2-Methylphenanthrene | 2531-84-2 | 6 | 0 (0, 0) | 0 | 0 (0, 0) |  |  |  |  |  |  | X |
| Phantolide | 15323-35-0 | 6 | 0 (0, 0) | 0 | 0 (0, 0) |  | X |  |  |  |  |  |
| Benzyl cinnamate | 103-41-3 | 5 | 0 (0, 0) | 5 | 0 (0, 0) |  | X |  | X |  |  |  |
| 1-Methylphenanthrene | 832-69-9 | 5 | 0 (0, 0) | 0 | 0 (0, 0) |  |  |  |  |  |  | X |
| Promecarb | 2631-37-0 | 5 | 0 (0, 0) | 5 | 0 (0, 0) |  |  | X |  |  |  |  |
| Hydroxy-citronellal | 107-75-5 | 5 | 0 (0, 0) | 5 | 0 (0, 0) |  | X |  |  |  |  |  |
| Fluorene | 86-73-7 | 5 | 0 (0, 0) | 0 | 0 (0, 0) |  |  |  |  |  |  | X |
| Fipronil | 120068-37-3 | 4 | 0 (0, 0) | 0 | 0 (0, 0) |  |  | X |  |  | X |  |
| Fenobucarb | 3766-81-2 | 4 | 0 (0, 0) | 5 | 0 (0, 0) |  |  | X |  |  |  |  |
| Thymol | 89-83-8 | 4 | 0 (0, 0) | 5 | 0 (0, 0) |  |  |  |  |  | X |  |
| Acenaphthylene | 208-96-8 | 4 | 0 (0, 0) | 10 | 0 (0, 0) |  |  |  |  |  |  | X |
| Triethyl phosphate | 78-40-0 | 4 | 0 (0, 0) | 5 | 0 (0, 0) | X |  | X |  | X |  |  |
| Phthalimide | 85-41-6 | 4 | 0 (0, 0) | 10 | 0 (0, 0) | X |  | X |  |  |  |  |
| Cashmeran | 33704-61-9 | 4 | 0 (0, 0) | 10 | 0 (0, 0) |  | X |  |  |  |  |  |
| Indole | 120-72-9 | 3 | 0 (0, 0) | 5 | 0 (0, 0) | X | X |  |  |  |  |  |
| 3-Tert-butylphenol | 585-34-2 | 3 | 0 (0, 0) | 5 | 0 (0, 0) | X |  |  |  |  |  |  |
| Tri-p-tolyl phosphate | 78-32-0 | 3 | 0 (0, 0) | 0 | 0 (0, 0) | X |  |  |  |  |  |  |
| PBDE 47 | 5436-43-1 | 3 | 0 (0, 0) | 0 | 0 (0, 0) |  |  |  |  | X |  |  |
| Pyriproxyfen | 95737-68-1 | 3 | 0 (0, 0) | 10 | 0 (0, 0) |  |  | X |  |  |  |  |
| Bisphenol A | 80-05-7 | 3 | 0 (0, 0) | 0 | 0 (0, 0) | X |  |  |  |  |  |  |
| Tricresylphosphate, meta- | 563-04-2 | 2 | 0 (0, 0) | 0 | 0 (0, 0) | X |  |  |  | X |  |  |
| 1-Hydroxynaphthalene | 90-15-3 | 2 | 0 (0, 0) | 0 | 0 (0, 0) | X |  |  |  |  |  | X |
| PBDE 49 | 243982-82-3 | 2 | 0 (0, 0) | 0 | 0 (0, 0) |  |  |  |  | X |  |  |
| O-Phenylphenol | 90-43-7 | 2 | 0 (0, 0) | 0 | 0 (0, 0) | X |  | X |  |  |  |  |
| 4-Chlorophenyl isocyanate | 104-12-1 | 2 | 0 (0, 0) | 0 | 0 (0, 0) | X |  | X |  |  |  |  |
| Acenaphthene | 83-32-9 | 2 | 0 (0, 0) | 0 | 0 (0, 0) |  |  |  |  |  |  | X |
| Promecarb artifact [5-isopropyl-3-methylphenol] | 3228-03-3 | 2 | 0 (0, 0) | 0 | 0 (0, 0) |  |  | X |  |  |  |  |
| 2,6-Dimethylnaphthalene | 581-42-0 | 2 | 0 (0, 0) | 0 | 0 (0, 0) |  |  |  |  |  |  | X |
| Isobornyl thiocyanoacetate | 115-31-1 | 2 | 0 (0, 0) | 10 | 0 (0, 0) |  |  | X |  |  |  |  |
| Celestolide | 13171-00-1 | 2 | 0 (0, 0) | 5 | 0 (0, 0) |  | X |  | X |  |  |  |
| Cinerin I | 25402-06-6 | 2 | 0 (0, 0) | 0 | 0 (0, 0) |  |  | X |  |  |  |  |
| Cypermethrin-2 | 52315-07-8 | 2 | 0 (0, 0) | 0 | 0 (0, 0) |  |  | X |  |  |  |  |
| Farnesol I | 4602-84-0 | 2 | 0 (0, 0) | 0 | 0 (0, 0) |  | X |  | X |  |  |  |
| Geraniol | 106-24-1 | 2 | 0 (0, 0) | 5 | 0 (0, 0) |  | X |  | X |  |  |  |
| 3-Chloroaniline | 108-42-9 | 2 | 0 (0, 0) | 0 | 0 (0, 0) | X |  |  |  |  |  |  |
| 2-Methylnaphthalene | 91-57-6 | 2 | 0 (0, 0) | 0 | 0 (0, 0) | X |  |  |  |  |  | X |
| Diuron Metabolite [3,4-Dichlorophenyl isocyanate] | 102-36-3 | 2 | 0 (0, 0) | 0 | 0 (0, 0) | X |  |  |  |  |  |  |
| Benzo(a)pyrene-7,8-dione | 65199-11-3 | 1 | 0 (0, 0) | 0 | 0 (0, 0) |  |  |  |  |  |  | X |
| Isoeugenol | 97-54-1 | 1 | 0 (0, 0) | 0 | 0 (0, 0) |  | X |  |  |  |  |  |
| 2,6-Di-tert-butyl-4-ethylphenol | 4130-42-1 | 1 | 0 (0, 0) | 0 | 0 (0, 0) | X |  |  |  |  |  |  |
| 2,6-Di-tert-butylphenol | 128-39-2 | 1 | 0 (0, 0) | 0 | 0 (0, 0) | X |  |  |  |  |  |  |
| Methoxychlor | 72-43-5 | 1 | 0 (0, 0) | 10 | 0 (0, 0) |  |  | X |  |  | X |  |
| Hexazinone | 51235-04-2 | 1 | 0 (0, 0) | 0 | 0 (0, 0) |  |  | X |  |  |  |  |
| 2,4-Dichlorophenol | 120-83-2 | 1 | 0 (0, 0) | 0 | 0 (0, 0) | X |  | X |  |  |  |  |
| PBDE 99 | 60348-60-9 | 1 | 0 (0, 0) | 0 | 0 (0, 0) |  |  |  |  | X |  |  |
| PCB 94 | 73575-55-0 | 1 | 0 (0, 0) | 0 | 0 (0, 0) |  |  |  |  |  |  |  |
| Pentachloroanisole | 1825-21-4 | 1 | 0 (0, 0) | 0 | 0 (0, 0) |  |  | X |  |  |  |  |
| Carvone | 99-49-0 | 1 | 0 (0, 0) | 0 | 0 (0, 0) |  | X | X | X |  |  |  |
| Musk Ketone | 81-14-1 | 1 | 0 (0, 0) | 0 | 0 (0, 0) |  | X |  |  |  |  |  |
| Tolyltriazole [1H-Benzotriazole, 4-methyl-] | 29878-31-7 | 1 | 0 (0, 0) | 0 | 0 (0, 0) | X |  |  |  |  |  |  |
| 2,6-Diethylnaphthalene | 59919-41-4 | 1 | 0 (0, 0) | 0 | 0 (0, 0) |  |  |  |  |  |  | X |
| Benzo[a]fluorene | 238-84-6 | 1 | 0 (0, 0) | 0 | 0 (0, 0) |  |  |  |  |  |  | X |
| Benzo[b]fluorene | 243-17-4 | 1 | 0 (0, 0) | 0 | 0 (0, 0) |  |  |  |  |  |  | X |
| 2,6-Dimethylphenol | 576-26-1 | 1 | 0 (0, 0) | 0 | 0 (0, 0) | X |  |  | X |  |  |  |
| 2-Chlorosyringaldehyde | 76341-69-0 | 1 | 0 (0, 0) | 10 | 0 (0, 0) | X |  |  |  |  |  |  |
| Methyleugenol | 93-15-2 | 1 | 0 (0, 0) | 0 | 0 (0, 0) |  | X |  |  |  |  |  |
| Azobenzene | 103-33-3 | 1 | 0 (0, 0) | 0 | 0 (0, 0) | X |  | X |  |  |  |  |
| Benzo[a]pyrene | 50-32-8 | 1 | 0 (0, 0) | 0 | 0 (0, 0) |  |  |  |  |  |  | X |
| Citral B | 5392-40-5 | 1 | 0 (0, 0) | 0 | 0 (0, 0) |  | X |  | X |  |  |  |
| Farnesol II | 4602-84-0 | 1 | 0 (0, 0) | 0 | 0 (0, 0) |  | X |  | X |  |  |  |
| Farnesol IV | 4602-84-0 | 1 | 0 (0, 0) | 0 | 0 (0, 0) |  | X |  | X |  |  |  |
| Chrysene | 218-01-9 | 1 | 0 (0, 0) | 0 | 0 (0, 0) |  |  |  |  |  |  | X |
| Fluoranthene | 206-44-0 | 1 | 0 (0, 0) | 0 | 0 (0, 0) |  |  |  |  |  |  | X |
| 1-Naphthylamine | 134-32-7 | 1 | 0 (0, 0) | 0 | 0 (0, 0) | X |  |  |  |  |  |  |
| Simetryn | 1014-70-6 | 1 | 0 (0, 0) | 0 | 0 (0, 0) |  |  | X |  |  |  |  |
| Retene | 483-65-8 | 1 | 0 (0, 0) | 0 | 0 (0, 0) |  |  |  |  |  |  | X |
| 3,5-Dichloroaniline | 626-43-7 | 1 | 0 (0, 0) | 0 | 0 (0, 0) | X |  | X |  |  | X |  |
| Biphenyl | 92-52-4 | 1 | 0 (0, 0) | 0 | 0 (0, 0) | X |  | X |  |  |  |  |
| Terbucarb | 1918-11-2 | 1 | 0 (0, 0) | 0 | 0 (0, 0) |  |  | X |  |  |  |  |
| Bioallethrin | 584-79-2 | 1 | 0 (0, 0) | 0 | 0 (0, 0) |  |  | X |  |  |  |  |
| Tetrachlorvinphos | 961-11-5 | 1 | 0 (0, 0) | 0 | 0 (0, 0) |  |  | X |  |  |  |  |
| D-(cis-trans)-Phenothrin-I | 26002-80-2 | 1 | 0 (0, 0) | 0 | 0 (0, 0) |  |  | X |  |  |  |  |
| 2-Methylphenol | 95-48-7 | 1 | 0 (0, 0) | 0 | 0 (0, 0) | X |  |  |  |  |  |  |
| Cyclopentadecanone | 502-72-7 | 1 | 0 (0, 0) | 0 | 0 (0, 0) |  | X |  |  |  |  |  |
| 3-Nitroaniline | 99-09-2 | 1 | 0 (0, 0) | 0 | 0 (0, 0) | X |  |  |  |  |  |  |
| Prallethrin, cis- | 23031-36-9 | 1 | 0 (0, 0) | 5 | 0 (0, 0) |  |  | X |  |  |  |  |
| Tricresylphosphate, ortho- | 78-30-8 | 1 | 0 (0, 0) | 0 | 0 (0, 0) | X |  |  |  | X |  |  |
| Trans-Nonachlor | 39765-80-5 | 0.4 | 0 (0, 0) | 0 | 0 (0, 0) |  |  | X |  |  |  |  |
| 6-Methylchrysene | 1705-85-7 | 0.4 | 0 (0, 0) | 0 | 0 (0, 0) |  |  |  |  |  |  | X |
| Azoxystrobin | 131860-33-8 | 0.4 | 0 (0, 0) | 5 | 0 (0, 0) |  |  | X |  |  |  |  |
| Cyphenothrin cis- | 39515-40-7 | 0.4 | 0 (0, 0) | 0 | 0 (0, 0) |  |  | X |  |  |  |  |
| Cinerin II | 121-20-0 | 0.4 | 0 (0, 0) | 0 | 0 (0, 0) |  |  | X |  |  |  |  |
| Tetramethrin II | 999050-03-2 | 0.4 | 0 (0, 0) | 0 | 0 (0, 0) |  |  | X |  |  |  |  |
| D-(cis-trans)-Phenothrin-II | 999034-03-6 | 0.4 | 0 (0, 0) | 0 | 0 (0, 0) |  |  | X |  |  |  |  |
| XMC (3,4-Dimethylphenyl N-methylcarbamate) | 2425-10-7 | 0.4 | 0 (0, 0) | 0 | 0 (0, 0) |  |  | X |  |  |  |  |
| 1,8-Dimethylnaphthalene | 569-41-5 | 0.4 | 0 (0, 0) | 0 | 0 (0, 0) |  |  |  |  |  |  | X |
| 1,4-Dimethylnaphthalene | 571-58-4 | 0.4 | 0 (0, 0) | 0 | 0 (0, 0) |  |  |  |  |  |  | X |
| 4-Chlorophenol | 106-48-9 | 0.4 | 0 (0, 0) | 0 | 0 (0, 0) | X |  |  |  |  |  |  |
| Alpha-Chlordane | 5103-71-9 | 0.4 | 0 (0, 0) | 0 | 0 (0, 0) |  |  | X |  |  |  |  |
| Anisyl alcohol | 105-13-5 | 0.4 | 0 (0, 0) | 0 | 0 (0, 0) |  | X |  |  |  |  |  |
| Cinnamyl alcohol | 104-54-1 | 0.4 | 0 (0, 0) | 0 | 0 (0, 0) |  | X |  |  |  |  |  |
| METHYL 2-OCTYNOATE | 111-12-6 | 0.4 | 0 (0, 0) | 0 | 0 (0, 0) |  | X |  | X |  |  |  |
| 2-Chloroaniline | 95-51-2 | 0.4 | 0 (0, 0) | 0 | 0 (0, 0) | X |  |  |  |  |  |  |
| Benzotriazole | 95-14-7 | 0.4 | 0 (0, 0) | 0 | 0 (0, 0) | X |  |  |  |  |  |  |
| 2,6-Diethylaniline | 579-66-8 | 0.4 | 0 (0, 0) | 0 | 0 (0, 0) | X |  |  |  |  |  |  |
| 2,6-Diisopropylaniline | 24544-04-5 | 0.4 | 0 (0, 0) | 0 | 0 (0, 0) | X |  |  |  |  |  |  |
| 2,3,5-Trimethylphenol | 697-82-5 | 0.4 | 0 (0, 0) | 0 | 0 (0, 0) | X | X |  |  |  |  |  |
| 2,6-Dimethoxyphenol | 91-10-1 | 0.4 | 0 (0, 0) | 0 | 0 (0, 0) | X |  |  | X |  |  |  |
| 4-Isopropylphenol | 99-89-8 | 0.4 | 0 (0, 0) | 5 | 0 (0, 0) | X | X |  |  |  |  |  |
| Benz[a]anthracene | 56-55-3 | 0.4 | 0 (0, 0) | 0 | 0 (0, 0) |  |  |  |  |  |  | X |
| 2,4-Di-tert-amylphenol | 120-95-6 | 0.4 | 0 (0, 0) | 0 | 0 (0, 0) | X |  |  | X |  |  |  |
| 2-Aminophenol | 95-55-6 | 0.4 | 0 (0, 0) | 0 | 0 (0, 0) | X |  |  |  |  |  |  |
| Guaiacol | 90-05-1 | 0.4 | 0 (0, 0) | 0 | 0 (0, 0) | X |  |  |  |  |  |  |
| 4-Alpha-cumylphenol | 599-64-4 | 0.4 | 0 (0, 0) | 0 | 0 (0, 0) | X |  |  |  |  |  |  |
| 4-Methoxyphenol | 150-76-5 | 0.4 | 0 (0, 0) | 0 | 0 (0, 0) | X |  |  |  |  | X |  |
| Cycloate | 1134-23-2 | 0.4 | 0 (0, 0) | 0 | 0 (0, 0) |  |  | X |  |  |  |  |
| Benzo[k]fluoranthene | 207-08-9 | 0.4 | 0 (0, 0) | 0 | 0 (0, 0) |  |  |  |  |  |  | X |
| Dibenzo[a,h]anthracene | 53-70-3 | 0.4 | 0 (0, 0) | 0 | 0 (0, 0) |  |  |  |  |  |  | X |
| Gamma-Chlordane | 5103-74-2 | 0.4 | 0 (0, 0) | 0 | 0 (0, 0) |  |  | X |  |  |  |  |
| Malathion | 121-75-5 | 0.4 | 0 (0, 0) | 0 | 0 (0, 0) |  |  | X |  |  | X |  |
| Methomyl | 16752-77-5 | 0.4 | 0 (0, 0) | 0 | 0 (0, 0) |  |  | X |  |  |  |  |
| 1,4-Naphthoquinone | 130-15-4 | 0.4 | 0 (0, 0) | 0 | 0 (0, 0) |  |  |  |  |  |  | X |
| Phenol | 108-95-2 | 0.4 | 0 (0, 0) | 0 | 0 (0, 0) |  |  |  |  |  | X |  |
| Diphenylamine | 122-39-4 | 0.4 | 0 (0, 0) | 0 | 0 (0, 0) |  |  | X |  |  |  |  |
| Bifenthrin | 82657-04-3 | 0.4 | 0 (0, 0) | 0 | 0 (0, 0) |  |  | X |  |  |  |  |
| PCB 138 | 35065-28-2 | 0.4 | 0 (0, 0) | 0 | 0 (0, 0) |  |  |  |  |  |  |  |
| PCB 153 | 35065-27-1 | 0.4 | 0 (0, 0) | 0 | 0 (0, 0) |  |  |  |  |  |  |  |
| 4H-cyclopenta[def]phenanthren-4-one | 5737-13-3 | 0.4 | 0 (0, 0) | 0 | 0 (0, 0) | X |  |  |  |  |  | X |
| 9-Fluorenone | 486-25-9 | 0.4 | 0 (0, 0) | 0 | 0 (0, 0) | X |  |  |  |  |  | X |
| 3,6-Dimethylphenanthrene | 1576-67-6 | 0.4 | 0 (0, 0) | 0 | 0 (0, 0) |  |  |  |  |  |  | X |
| 1,6-Dimethylnaphthalene | 575-43-9 | 0.4 | 0 (0, 0) | 0 | 0 (0, 0) |  |  |  |  |  |  | X |
| 1,2-Dimethylnaphthalene | 573-98-8 | 0.4 | 0 (0, 0) | 0 | 0 (0, 0) |  |  |  |  |  |  | X |
| 2-Methylanthracene | 613-12-7 | 0.4 | 0 (0, 0) | 0 | 0 (0, 0) |  |  |  |  |  |  | X |
| 1-Methylpyrene | 2381-21-7 | 0.4 | 0 (0, 0) | 0 | 0 (0, 0) |  |  |  |  |  |  | X |
| PCB 91 | 68194-05-8 | 0.4 | 0 (0, 0) | 0 | 0 (0, 0) |  |  |  |  |  |  |  |
| PCB 127 | 39635-33-1 | 0.4 | 0 (0, 0) | 0 | 0 (0, 0) |  |  |  |  |  |  |  |
| PCB 141 | 52712-04-6 | 0.4 | 0 (0, 0) | 0 | 0 (0, 0) |  |  |  |  |  |  |  |
| PCB 143 | 68194-15-0 | 0.4 | 0 (0, 0) | 0 | 0 (0, 0) |  |  |  |  |  |  |  |
| 2,4-Dimethylaniline | 95-68-1 | 0.4 | 0 (0, 0) | 0 | 0 (0, 0) | X |  |  |  |  |  |  |
| Di-n-propyl phthalate | 131-16-8 | 0.4 | 0 (0, 0) | 0 | 0 (0, 0) | X |  |  |  |  | X |  |
| Pyrimethanil | 53112-28-0 | 0.4 | 0 (0, 0) | 0 | 0 (0, 0) |  |  | X |  |  |  |  |
| Dimethametryn | 22936-75-0 | 0.4 | 0 (0, 0) | 0 | 0 (0, 0) |  |  | X |  |  |  |  |
| Bioallethrin S-cyclopentenyl isomer | 28434-00-6 | 0.4 | 0 (0, 0) | 0 | 0 (0, 0) |  |  | X |  |  |  |  |
| TCMTB | 21564-17-0 | 0.4 | 0 (0, 0) | 0 | 0 (0, 0) | X |  | X |  |  |  |  |
| Bromoxynil octanoic acid ester | 1689-99-2 | 0.4 | 0 (0, 0) | 0 | 0 (0, 0) |  |  | X |  |  |  |  |
| Tetramethrin I | 7696-12-0 | 0.4 | 0 (0, 0) | 5 | 0 (0, 0) |  |  | X |  |  |  |  |
| Tetrahydrophthalimide, cis-1,2,3,6- | 27813-21-4 | 0.4 | 0 (0, 0) | 0 | 0 (0, 0) |  |  | X |  |  |  |  |
| TCEP | 115-96-8 | 0.4 | 0 (0, 0) | 0 | 0 (0, 0) |  |  |  |  | X |  |  |
| Musk Moskene | 116-66-5 | 0.4 | 0 (0, 0) | 0 | 0 (0, 0) |  | X |  |  |  |  |  |
| Dipropyl isocinchomeronate | 136-45-8 | 0.4 | 0 (0, 0) | 0 | 0 (0, 0) |  |  | X |  |  |  |  |
| Prothioconazole-desthio | 999007-03-3 | 0.4 | 0 (0, 0) | 0 | 0 (0, 0) |  |  | X |  |  |  |  |
| Chlorfenapyr | 122453-73-0 | 0.4 | 0 (0, 0) | 0 | 0 (0, 0) |  |  | X |  |  |  |  |
| Trifenmorph | 1420-06-0 | 0.4 | 0 (0, 0) | 0 | 0 (0, 0) |  |  | X |  |  |  |  |

| Supplemental Table 2. Summary of chemicals detected in silicone wristbands by MyExposome classification. | | | | |
| --- | --- | --- | --- | --- |
|  | 12 Gestational Weeks | | 24 Gestational Weeks | |
|  | (n = 255) | | (n = 20) | |
| MyExposome Classification | Median (IQR) | Range | Median (IQR) | Range |
| Total | 23 (20, 26) | (12, 37) | 19 (18, 22) | (16, 28) |
| Chemicals in commerce | 12 (10, 13) | (6, 20) | 10 (9, 12) | (7, 14) |
| Personal care products | 10 (8, 11) | (3, 19) | 9 (7, 9) | (5, 13) |
| Pesticides | 6 (5, 8) | (2, 15) | 7 (5, 7) | (4, 11) |
| Consumer products | 2 (1, 3) | (0, 8) | 2 (1, 2) | (0, 3) |
| Flame retardants | 1 (1, 2) | (0, 4) | 1 (1, 2) | (0, 3) |
| Pharmacological | 1 (1, 2) | (0, 4) | 1 (0, 1) | (0, 2) |
| PAHs | 1 (0, 2) | (0, 10) | 0 (0, 1) | (0, 1) |
| Note: Chemicals may be classified within more than one category. See Supplemental Table 1 for chemical classifications.  Abbreviations: IQR, interquartile range; PAHs, polycyclic aromatic hydrocarbons. | | | | |

| Supplemental Table 3. Multivariable linear regression of specific characteristics in relation to wristband chemical detection or chemical concentrations. | | |
| --- | --- | --- |
| Characteristic | Chemical | Beta (95% CI) |
| Nail polish usea | Number of detected personal care product chemicals | 0.43 (-0.22, 1.09) |
|  | Triphenyl phosphate | 0.27 (0.00, 0.55) |
|  | Di-n-butyl phthalate | -0.10 (-0.37, 0.17) |
|  | Diisobutyl phthalate | -0.21 (-0.49, 0.07) |
|  | Butyl benzyl phthalate | -0.02 (-0.31, 0.27) |
|  | Di-n-nonyl phthalate | -0.09 (-0.39, 0.20) |
|  | Diethyl phthalate | 0.01 (-0.28, 0.30) |
| Handwashingb | Number of detected chemicals | -0.02 (-0.11, 0.07) |
| Gardeningc | Number of detected pesticides | 0.28 (-0.34, 0.91) |
|  | Di-n-butyl phthalate | 0.18 (-0.14, 0.50) |
|  | N,N-Diethyl-m-toluamide | 0.16 (-0.14, 0.47) |
|  | Benzyl benzoate | -0.07 (-0.37, 0.24) |
|  | Permethrin | 0.11 (-0.26, 0.49) |
|  | Diethyl phthalate | 0.01 (-0.31, 0.34) |
| Parityd | Triphenyl phosphate | -0.07 (-0.35, 0.20) |
| Season - Falle | Benzophenone | Ref |
| Season - Wintere |  | -0.02 (-0.39, 0.35) |
| Season - Springe |  | 0.05 (-0.30, 0.40) |
| Season - Summere |  | 0.23 (-0.18, 0.65) |
| Season - Falle | Number of detected pesticides | Ref |
| Season - Wintere |  | -0.82 (-1.51, -0.13) |
| Season - Springe |  | -0.15 (-0.81, 0.51) |
| Season - Summere |  | -0.13 (-0.89, 0.63) |
| Note: Multivariable linear regression models adjusted for age (linear), body mass index (BMI, linear), educational attainment (less than college graduate, college graduate, any post-graduate), marital status (married, unmarried), race and ethnicity (White Non-Hispanic, other), parity (0, ≥1), self-reported smoke exposure during pregnancy (first- or second-hand exposure, none), season (winter, spring, fall, summer), and gestational age the wristband was first worn (linear). Chemical concentrations median standardized to batch, and centered (mean = 0) and scaled (standard deviation = 1). Missing covariate data imputed via multiple imputation. aReported first trimester nail polish use (hand or foot); referent is no reported use relative to any reported use. bReported average number of times handwashing per day; linear.  cReported gardening in first trimester; referent is no reported gardening in first trimester relative to reported gardening in first trimester.  dParous versus nulliparous women.  eSeason of wear for the wristband; referent is fall, relative to winter, spring, and summer. | | |

| Supplemental Table 4. Multivariable linear regression of seasona in relation to chemical concentrations measured in wristbands worn at 12 gestational weeks. | | | |
| --- | --- | --- | --- |
| Chemical | Spring | Summer | Winter |
| Di-n-butyl phthalate | -0.10 (-0.44, 0.24) | -0.10 (-0.50, 0.29) | -0.10 (-0.46, 0.26) |
| Galaxolide | 0.10 (-0.24, 0.45) | -0.12 (-0.52, 0.28) | -0.04 (-0.40, 0.32) |
| Diisobutyl phthalate | 0.17 (-0.17, 0.51) | -0.03 (-0.43, 0.37) | -0.27 (-0.63, 0.09) |
| Butyl benzyl phthalate | 0.33 (-0.01, 0.68) | 0.09 (-0.31, 0.49) | 0.07 (-0.29, 0.43) |
| Lilial | 0.14 (-0.20, 0.49) | 0.04 (-0.36, 0.44) | 0.05 (-0.31, 0.41) |
| Benzyl salicylate | 0.42 (0.08, 0.75) | 0.05 (-0.35, 0.44) | -0.01 (-0.37, 0.34) |
| Tonalide | 0.22 (-0.13, 0.56) | 0.13 (-0.27, 0.53) | 0.07 (-0.29, 0.43) |
| N,N-Diethyl-m-toluamide | 0.09 (-0.25, 0.42) | 0.27 (-0.12, 0.66) | -0.17 (-0.52, 0.19) |
| Benzophenone | 0.05 (-0.30, 0.40) | 0.23 (-0.18, 0.65) | -0.02 (-0.39, 0.35) |
| Ethylene brassylate | 0.10 (-0.24, 0.43) | -0.15 (-0.53, 0.24) | 0.42 (0.06, 0.78) |
| Benzyl benzoate | -0.16 (-0.50, 0.17) | -0.30 (-0.70, 0.10) | -0.14 (-0.49, 0.21) |
| Di-n-nonyl phthalate | -0.01 (-0.35, 0.33) | 0.18 (-0.21, 0.57) | 0.10 (-0.26, 0.46) |
| Permethrin | -0.04 (-0.39, 0.31) | 0.21 (-0.19, 0.61) | -0.15 (-0.51, 0.21) |
| Diethyl phthalate | 0.35 (0.00, 0.69) | 0.06 (-0.34, 0.45) | 0.27 (-0.09, 0.64) |
| Butylated hydroxyanisole | -0.29 (-0.63, 0.05) | -0.37 (-0.76, 0.03) | 0.03 (-0.33, 0.39) |
| 2,4-Di-tert-butylphenol | 0.45 (0.12, 0.79) | 0.00 (-0.38, 0.38) | -0.04 (-0.39, 0.31) |
| Note: Multivariable linear regression models adjusted for age (linear), body mass index (BMI, linear), educational attainment (less than college graduate, college graduate, any post-graduate), marital status (married, unmarried), race and ethnicity (White Non-Hispanic, other), parity (0, ≥1), self-reported smoke exposure during pregnancy (first- or second-hand exposure, none), and gestational age the wristband was first worn (linear). Chemical concentrations median standardized to batch, and centered (mean = 0) and scaled (standard deviation = 1). Missing covariate data imputed via multiple imputation. aSeason of wear for the wristband; referent is fall, relative to winter, spring, and summer. | | | |

| Supplemental Table 5. Median concentrations of chemicals measured in wristbands worn at 12 gestational weeks by SOM profile. | | | | | | |
| --- | --- | --- | --- | --- | --- | --- |
|  |  | Profile | | | | |
| Chemical | Primary Class | 1  (n = 15) | 2 (n = 149) | 4 (n = 19) | 5 (n = 34) | 7 (n = 10) |
| Butyl benzyl phthalate | Phthalate | -0.42 | -0.38 | 2.37 | -0.37 | -0.10 |
| Di-n-butyl phthalate | Phthalate | -0.16 | -0.21 | 0.32 | -0.42 | 2.41 |
| Di-n-nonyl phthalate | Phthalate | -0.34 | -0.34 | -0.31 | -0.12 | -0.34 |
| Diethyl phthalate | Phthalate | -0.02 | -0.24 | -0.24 | -0.10 | -0.34 |
| Diisobutyl phthalate | Phthalate | -0.25 | -0.31 | 0.05 | -0.14 | 3.25 |
| Benzyl benzoate | Pesticide | -0.33 | -0.30 | -0.31 | 0.42 | -0.15 |
| N,N-Diethyl-m-toluamide | Pesticide | -0.25 | -0.23 | -0.17 | -0.22 | -0.19 |
| Permethrin | Pesticide | -0.19 | -0.21 | -0.15 | -0.23 | -0.22 |
| 2,4-Di-tert-butylphenol | Chemicals in commerce | 1.80 | -0.24 | -0.24 | -0.19 | 0.42 |
| Galaxolide | Chemicals in commerce | -0.32 | -0.44 | -0.34 | 1.79 | -0.53 |
| Benzophenone | Personal care products | 0.09 | -0.15 | -0.21 | -0.09 | 0.26 |
| Benzyl salicylate | Personal care products | -0.48 | -0.30 | -0.17 | 0.49 | -0.30 |
| Butylated hydroxyanisole | Personal care products | -0.18 | -0.18 | 0.06 | -0.20 | -0.13 |
| Ethylene brassylate | Personal care products | -0.29 | -0.33 | -0.19 | -0.09 | -0.51 |
| Lilial | Personal care products | -0.32 | -0.36 | -0.27 | 0.14 | -0.50 |
| Tonalide | Personal care products | -0.17 | -0.27 | -0.23 | -0.09 | -0.29 |
| Chemical concentrations median standardized to batch, and centered (mean = 0) and scaled (standard deviation = 1). | | | | | | |
